# Supplementary material for: Soft chemistry-derived Al-substituted hydrated nickel hydroxide electrodes for rechargeable aqueous batteries
Source: Royal Society of Chemistry journal article supplement (doi:10.1039/d4cc02893g), 2024-01-01
Supplement: d4cc02893g1.pdf [file d4cc02893g1.pdf]

**Supplementary Information of**  
**“Soft chemistry derived Al-substituted hydrated nickel**  
**hydroxide electrodes for rechargeable aqueous batteries”**

Kento Imai <sup>a</sup>, Atsunori Ikezawa <sup>a</sup>, Shigeki Sato <sup>b</sup>, and Hajime Arai <sup>a\*</sup>

*a. School of Materials and Chemical Technology, Tokyo Institute of Technology, Yokohama 226-8501 Japan*

*b. Advanced Material Engineering Division, Toyota Motor Corporation, 1200, Mishuku, Susono, Shizuoka 410-1193 Japan*

\* Corresponding Author: (E-mail) [arai.h.af@m.titech.ac.jp](mailto:arai.h.af@m.titech.ac.jp)

## 1. Additional figures.

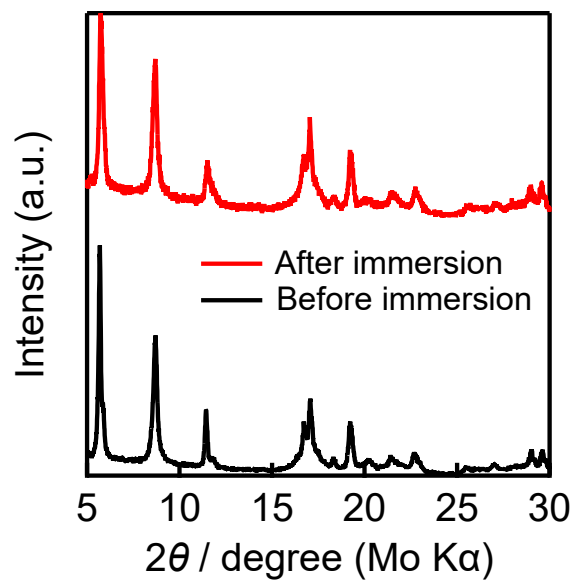

Figure S1. XRD profiles of Al-substituted hydrated nickel hydroxide before and after immersion in 6 mol dm<sup>-3</sup> KOH electrolyte for 60 h.

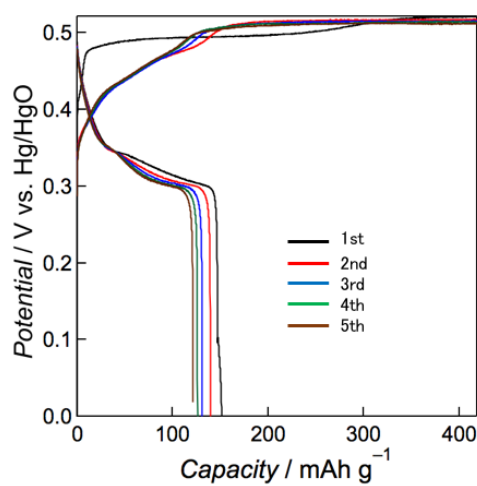

Figure S2. Charge-discharge performance of β-Ni(OH)<sub>2</sub> electrode prepared by the same manner as hydrated nickel hydroxide electrodes in this study.

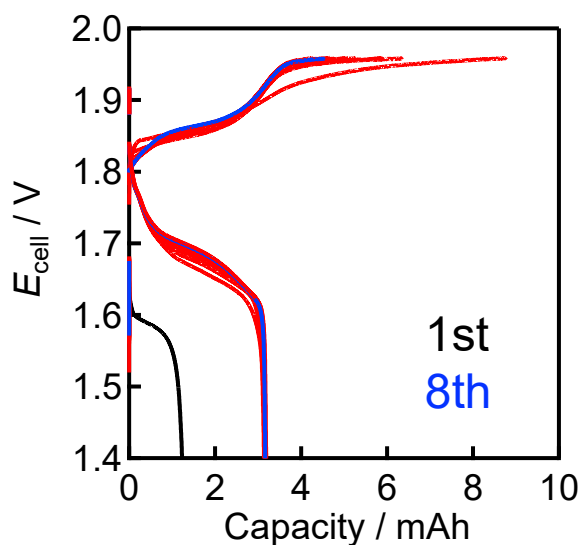

Figure S3. Discharge-charge performance of a full cell with the hydrated Al-substituted  $\gamma$ -NiOOH and metallic zinc plate as positive and negative electrodes in  $6 \text{ mol dm}^{-3}$  KOH cycled at 0.1C for the nickel electrode.

## 2. Synthesis of the coprecipitation sample

Nickel nitrate and aluminum nitrate powder (Ni:Al=0.9:0.1) was dissolved in water and the hydroxide was precipitated by lithium hydroxide solution at  $120^\circ\text{C}$ . The obtained precipitates were filtered, washed and dried.

## 3. Chemical Reagent used in this manuscript

Nickel nitrate: Kanto Chemicals, purity 98%.

Aluminum nitrate: Wako Chemicals, purity 99.9%.

Lithium hydroxide solution:  $0.5 \text{ mol dm}^{-3}$ , Kanto Chemicals, purity 98%.

Lithium hydroxide monohydrate: Kanto Chemicals, purity 98%.

Nickel carbonate basic: Kanto Chemicals, nickel content 50%.
